# Supplementary material
Source: PubMed Central journal article supplement (PMC3193117)
Supplement: supp_101512_socio-chugh-1-at.pdf [file supp_101512_socio-chugh-1-at.pdf]

**Appendix 1 (as supplied by the authors): ROC Epistry**  
(please go to the ROC website at [www.uwctc.org](http://www.uwctc.org) and click on ROC for additional acknowledgments)

---

**Alabama Resuscitation Center, University of Alabama at Birmingham, Birmingham, AL:** Jeffrey D. Kerby, MD, PhD, Principal Investigator

**Core Investigators:** Todd B. Brown, MD, MSPH, Thomas Terndrup, MD

**Coordinators:** Shannon W. Stephens, EMT-P, Carolyn R. Williams, BSN, BSME

**EMS Investigators/Collaborators:** Joe E. Acker, EMT-P, MPH, Michael L. Minor, EMT-P

**Hospital Investigators/Collaborators:** Paul A. MacLennan, PhD, Patrick R. Pritchard, MD, Sandra Caldwell, MA, Katherine R. Lai, BS

**Participating EMS Agencies:**

Alabama LifeSaver, Bessemer Fire and Rescue, Birmingham Fire and Rescue, Center Point Fire District, Chelsea Fire and Rescue, American Medical Response, Homewood Fire Dept., Pelham Fire Dept., Rocky Ridge Fire Dept., Regional Paramedic Services, Trussville Fire Dept., Vestavia Hills Fire and Rescue

---

**Dallas Center for Resuscitation Research, University of Texas Southwestern Medical Center, Dallas, TX:** Ahamed H. Idris, MD, Principal Investigator

**Core Investigators:** Fernando Benitez, MD, Raymond Fowler, MD, Dorothy Lemecha, MD, Joseph Minei, MD, Paul Pepe, MD, Michael Ramsay, MD, Robert Simonson, MD, Jane Wigginton, MD

**Coordinators:** Dixie Climer, RN, Melinda Moffat, RN, Kate Newman, RN, Pamela Owens, Andrea Bennett, BS

**EMS Investigators/Collaborators:** Richard Black, EMT-P, Debra Cason, RN, Billy Craft, EMT-P, Lucy Detamble, RN, Ryan Dykes, EMT-P, Tony Harvey, EMT-P, Suzanne Hewitt, RN, Marshal Isaacs, MD, Joe Kay, EMT-P, Tami Kayea, EMT-P, Richard LaChance, EMT-P, Thomas Lehman, Paul Mayer, MD, Jeffrey Metzger, MD, Danny Miller, EMT-P, Kenneth Navarro, EMT-P, Steven Parker, EMT-P, Karen Pickard, RN, Warren Porter, EMT-P, TJ Starling, EMT-P, Tommy Tine, EMT-P, Chris Vinson, EMT-P

**Hospital Investigators/Collaborators:** David Abebefe, MD, Steven Arze, MD, Sean Black, MD, Matthew Bush, MD, Michael Forman, MD, Jeffery Goodloe, MD, Ralph Kelly, DO, Gregory Lachar, MD, Alicia Mangram, MD, Marc Morales, MD, Edward Thornton, MD, Robert Wiebe, MD

**Participating EMS Agencies:**

Carrollton Fire Dept., Dallas Fire and Rescue, DeSoto Fire Dept., Duncanville Fire Dept., Farmers Branch Fire Dept., Garland Fire Dept., Highland Park Dept. of Public Safety, Irving Fire Dept., Lancaster Fire Dept., Mesquite Fire Dept., Plano Fire Dept., University Park Fire Dept.

---

**University of Iowa Carver College of Medicine-Iowa Resuscitation Network, University of Iowa, Iowa City, IA:** Richard Kerber, MD, Principal Investigator

**Core Investigators:** Steve Hata, MD, Dianne Atkins, MD

**Coordinators:** Melanie Kenney, RN, MA, CPNP, Catherine Rost, Alexander Drum, EMT-P, Michael Hartley, EMT-P

**Participating EMS Agencies:**

Area Ambulance Service, Davenport Hospital Ambulance Corporation, Covenant Health System - Covenant Ambulance, Covenant Health System - Mercy Oelwein, Covenant Health System - Sartori, City of Dubuque Fire Dept., Dallas County Emergency Medical Services, West Des Moines Emergency

Medical Services, Des Moines Fire Dept. EMS, Henry County Health Center Emergency Medical Services, Johnson County Ambulance, Siouxland Paramedics, Inc., Waterloo Fire Rescue

---

**Milwaukee Resuscitation Research Center, Medical College of Wisconsin, Milwaukee, WI:**

Tom P. Aufderheide, MD, Principal Investigator

**Core Investigators:** Ronald G. Pirrallo, MD, MHSA, Karen J. Brasel, MD, MPH, Andrea L. Winthrop, MD, John P. Klein, PhD

**Coordinators:** David J. Kitscha, BS, MS, Barbara J. Burja, BA, EMT, Chris von Briesen, BA, CCRC, Christopher W. Sparks, EMT, Sara Kaebisch, BS

**EMS Investigators/Collaborators:** John Chianelli, MS, Rosemarie Forster, MSOLQ, RHIA, EMT-P, Michael Milbrath, EMT-P, Lauryl Pukansky, BS, RHIA, Kenneth Sternig, MS-EHS, BSN, EMT-P, Eugene Chin, RN, EMT-P, Nancy Frieberg, RN, EMT-P, Kim Krueger, RN, EMT-P, Del Szewczuga, RN, EMT-P, Thomas Duerr, Rebecca Funk, BS, RHIA, EMT-B, Gail Jacobsen, BS, Janis Spitzer, Richard Demien, James Martins, John Cohn, Russell R. Spahn, MA, EMT-P, Mike Jankowski, BA, EMT-P, Timothy James, William E. Wentlandt Jr., MBA, EFO, David Berousek, Brian M. Satula, BA, NREMT, Jay B. Behling, BS, EMT-B, Dean K. Redman, BA, EFO, Steven Hook, BS, CFOD, Andrew Nearing, Jim Singer, RN

**Hospital Investigators/Collaborators:** Thomas Reminga, MD, Dennis Shepherd, MD, Peter Holzhauser, MD, Jonathan Rubin, MD, Craig Skold, MD, Orlando Alvarez, MD, Heidi Harkins, MD, Edward Barthell, MD, William Haselow, MD, Albert Yee, MD, John Whitcomb, MD, Eduardo E. Castro, MD, Steven Motarjeme, MD

**Participating EMS Agencies:**

Cudahy Fire Dept., Flight for Life, Franklin Fire Dept., Greendale Fire Dept., Greenfield Fire Dept., Hales Corners Fire Dept., Milwaukee County Airport Fire Dept., Milwaukee Fire Dept., North Shore Fire Dept., Oak Creek Fire Dept., South Milwaukee Fire Dept., St. Francis Fire Dept., Wauwatosa Fire Dept., West Allis Fire Dept.

---

**Ottawa/OPALS/British Columbia RCC, Ottawa Health Research Institute, University of Ottawa, Ottawa, Ontario and St. Paul's Hospital, University of British Columbia, British Columbia, Canada:** Ian Stiell, MD, Principal Investigator

**Core Investigators:** Jim Christenson, MD, Morad Hameed, MD, Jean Denis Yelle, MD, Martin Osmond, MD, Christian Vaillancourt, MD, David Evans, MD, Riyadh Abu-Laban, MD

**Coordinators:** Cathy Clement, RN, Tammy Beaudoin, CCHRA, Barb Boychuk, RN, Sarah Pennington, RN, Helen Connolly, RN, Patrick Lefaire, PCP, Jane Banek, CCHRA, Angela Marcantonio, Rina Marcantonio, CCHRA, Christine Leclair, RN, Julie Cummins, RN

**EMS Investigators/Collaborators:** Matthew Stempien, MD, Jonathan Dreyer, MD, Douglas Munkley, MD, Justin Maloney, MD, Paul Colella, MD, Andrew Affleck, MD, David Waldbillig, MD, Paul Bradford, MD, Martin Lees, MD, Vincent Arcieri, MD, Ann Wilson, BSc, ACP, Kenneth Boyle, EMCA, RRT, CMA, Lorraine Luinstra-Toohey, BScN, MHA, John Trickett, BScN, Nicole Sykes, BScN, RN, Elaine Graham, ACP, Kieran Ballah, EMCA, Cathy Hedges, A-EMCA, ACP, Paul Mathers, A-EMCA, Dug Andrusiek, MSc, Dan Bishop, ACP, Ron Straight, ACP, Brian Twaites, ACP, Stuart Donn, PhD

**Participating EMS Agencies:**

A.A. and M. Volunteer Ambulance Service, Burlington Fire and Rescue, Cambridge Fire Dept., Cornwall Fire and Rescue, Cornwall SDG Emergency Medical Services, Essex-Windsor Emergency Medical Services, Essex-Windsor Fire and Rescue, Frontenac Paramedic Service, Halton Emergency Medical Services, Harrow Ambulance Service Ltd., Kawartha Lakes Emergency Medical Services, Kawartha Lakes Fire and Rescue, Kingston Fire and Rescue, Kitchener Fire Dept., Lambton County Emergency Medical Services, Lasalle Fire Dept., London Fire Dept., Niagara Emergency Medical Services, Niagara Falls Fire and Rescue, Northumberland Emergency Medical Service, Oakville Fire Dept., Ottawa Fire and Rescue, Ottawa Paramedic Service, Peterborough Emergency Medical System, Peterborough Fire Dept., Prescott-Russell Emergency

Medical Services, Sarnia Fire Services, St. Catharine's Fire and Rescue, Sudbury Emergency Medical Services, Sudbury Fire and Rescue, SunParlour Emergency Services Inc., Superior North Emergency Medical Services, Tecumseh Fire Dept., Thames Emergency Medical Services, Thunder Bay Fire and Rescue, Waterloo Fire and Rescue, Waterloo Regional Emergency Medical Services, Welland Fire and Rescue, Windsor Fire and Rescue, British Columbia Ambulance Service, Abbotsford Fire Dept., Agassiz Valley Fire Dept., Burnaby Fire Dept., Campbell River Fire Dept., Central Saanich Fire Dept., City of North Vancouver Fire Dept., Coquitlam Fire Dept., Delta Fire Dept., Esquimalt Fire Dept., Kamloops Fire Dept., Kelowna Fire Dept., Lake Country V Fire Dept., Langford Fire Dept., Langley City Fire Dept., Langley Township Fire Dept., Maple Ridge Fire Dept., Mission Fire Dept., Nanaimo Fire Dept., New Westminster Fire Dept., North Vancouver District Fire Dept., Oak Bay Fire Dept., Peachland Valley Fire Dept., Pitt Meadows Fire Dept., Port Coquitlam Fire Rescue, Port Moody Fire Dept., Prince George Fire Dept., Prince Rupert Fire Dept., Qualicum Beach Fire Dept., Richmond Fire Dept., Saanich Fire Dept., Sooke V Fire Dept., Squamish Fire Dept., Surrey Fire Dept., Trail Fire Dept., Vancouver Fire Dept., Victoria Fire Dept., West Vancouver Fire Dept., Whistler Fire Dept., White Rock Fire Dept.

**Pittsburgh Resuscitation Network, the University of Pittsburgh, Pittsburgh, PA:** Clifton Callaway, MD, PhD, Principal Investigator

**Core Investigators:** Samuel Tisherman, MD, Jon Rittenberger, MD, David Hostler, PhD

**Coordinators:** Joseph Cundle, Mitch Kampmeyer, Timothy Markham, Maureen Morgan

**EMS Investigators/Collaborators:** Paul Sabol, Gina Sicchitano, Scott Sherry, Anthony Shrader, Greg Stull, Manuel Torres, MS, William Groft, Robert McCaughan, Rodney Rohrer, John Cole, MD, David Fuchs, MD, Francis Guyette, MD, MS, William Jenkins, MD, Ronald Roth, MD, Heather Walker, MD

**Hospital Investigators/Collaborators:** Alain Corcos, MD, Ankur Doshi, MD, Adrian Ong, MD, Andrew Peitzman, MD

**Participating EMS Agencies:**

Washington Ambulance and Chair, Pittsburgh Bureau of Emergency Medical Services, Pittsburgh Bureau of Fire, Mutual Aid Ambulance Service, STAT Medevac

**Portland Resuscitation Outcomes Consortium, Oregon Health and Science University, Portland, OR:** Jerris R. Hedges, MD, MS, Principal Investigator

**Core Investigators:** Craig D. Newgard, MD, MPH, Mohamud R. Daya, MD, MS, Robert A. Lowe, MD, MPH

**Coordinators:** Denise Griffiths, BS, John Brett, EMT-P, Dana Zive, MPH, Abdolaziz Yekrang, MPA, MA, Yoko Nakamura, MD, Brooke Frakes, BS, Aaron Monnig, EMT-P

**EMS Investigators/Collaborators:** Jonathan Jui, MD, MPH, Terri A. Schmidt, MD, MS, Ritu Sahni, MD, Craig R. Warden, MD, MPH, Marc D. Muhr, EMT-P2, John A. Stouffer, EMT-P, Kyle Gorman, MBA, EMT-P, Pontine Rosteck EMT-P, Karl Koenig EMT-P, Jan Lee EMT-P, Roxy Barnes EMT-P, Heather Tucker, EMT-P, Brad Allen, EMT-P, TJ Bishop, EMT-P, Adam Glaser, EMT-P

**Hospital Investigators/Collaborators:** Martin A. Schreiber, MD, Jim Anderson, MD, Ameen I. Ramzy, MD, K. Dean Gubler, DO, Lynn K. Wittwer, MD, Samantha Underwood, MS, Brooke Barone, BS, Denise Haun-Taylor, RN, Elizabeth Bryant, RN, Joanne Miller, ARNP

**Participating EMS Agencies:**

American Medical Response - Clackamas, Clark, and Multnomah Counties, Camas Fire Dept., Clackamas County Fire District #1, Clark County Fire District #6, Lake Oswego Fire Dept., LifeFlight, MetroWest Ambulance, North Country Ambulance, Tualatin Valley Fire and Rescue, Vancouver Fire Department, Portland Fire and Rescue, Portland International Airport Fire Department, Gresham Fire and Emergency Services

---

**UCSD-San Diego Resuscitation Research Center, University of California at San Diego, San Diego, CA:** Daniel Davis, MD, Principal Investigator

**Core Investigators:** David Hoyt, MD, Raul Coimbra, MD, PhD, Gary Vilke, MD

**Coordinators:** Donna Kelly, RN, Lana McCallum-Brown, RN

**EMS Investigators/Collaborators:** Bruce Haynes, MD, Brad Schwartz, MD

**Hospital Investigators/Collaborators:** Michael Sise, MD, Frank Kennedy, MD, Fred Simon, MD, Gail Tominaga, MD, John Steele, MD

**Participating EMS Agencies:**

Alpine Fire Protection District, American Medical Response, Barona Fire Dept., Bonita/Sunnyside Fire Protection, Borrego Springs Fire Protection District, Carlsbad Fire Dept., Chula Vista Fire Dept., Coronado Fire Dept., CSA-17 ALS Transporting Agency, Deer Springs, Del Mar Fire Dept., East County Fire Protection District, El Cajon Fire Dept., Elfin Forest CSA 107, Encinitas Fire Protection District, Escondido Fire Dept., Federal Fire Dept. San Diego, Imperial Beach Fire Dept., Julian-Cuyamaca Fire Dept., La Mesa Fire Dept., Lakeside Fire Protection District, Lemon Grove Fire Dept., Mercy Air, Miramar Fire Dept., National City Fire Dept., North County Fire, Oceanside Fire Dept., Pala Fire Dept., Poway Fire Dept., Ramona Fire Dept., Rancho Santa Fe Fire Protection District, San Diego Rural Fire Protection District, San Marcos Fire Dept., San Miguel Fire Protection District, Santee Fire Dept., Solana Beach Fire Dept., Sycuan Fire Dept., Valley Center/Mercy Ambulance, Viejas Fire Dept., Vista Fire Dept.

---

**Seattle-King County Center for Resuscitation Research at the University of Washington, University of Washington, Seattle, WA:** Peter J. Kudenchuk, MD, Principal Investigator

**Core Investigators:** Tom D. Rea, MD, Eileen Bulger, MD, Mickey S. Eisenberg, MD, Michael Copass, MD

**Coordinators:** Michele Olsufka, RN, Sally Ragsdale, ARNP, Debi Solberg, RN, MN, Susan Damon, RN, Randi Phelps, Jeanne O'Brien, RN, MN

**EMS Investigators/Collaborators:** Earl Sodeman, Marty LaFave, James Boehl, Dave Jones, Gary Somers, Deborah Ayr, Adrian Whorton, Sam Warren, Jim Fogarty, Jonathan Larsen, Mike Helbock

**Participating EMS Agencies:**

Bellevue Fire Dept., Redmond Fire Dept., Seattle Fire Dept., Shoreline Fire Dept., King Co Medic 1, Vashon Island Medic One, Bothell Fire Dept., Burien Fire Dept., Kirkland Fire Dept., Renton Fire Dept., Snoqualmie Fire Dept., Duvall Fire Dept., Eastside Fire and Rescue, Enumclaw Fire Dept., Fall City Fire Dept., Skyway Fire Dept., Kent Fire Dept., Maple Valley Fire and Life Safety, Mercer Island Fire Dept., King County Fire District #44, North Highline Fire Dept., Northshore/Kenmore Fire Dept., Port of Seattle Fire Dept., King County Fire District #47, King County Fire District #40, SeaTac Fire Dept., Skykomish Fire Dept., Snoqualmie Pass, South King Co Medic 1, South King Fire and Rescue, Tukwila Fire Dept., Valley Regional Fire Authority, Vashon Island Fire and Rescue, Woodinville Fire Dept.

---

**Toronto Regional Resuscitation Research Out of Hospital Network (Toronto Regional RESCUENET), University of Toronto, Toronto, Ontario, Canada:** Arthur Slutsky, Principal Investigator

**Core Investigators:** Laurie Morrison, Paul Dorian

**Coordinators:** Craig Beers, Blair Bigham, Dina Braga, Grace Burgess, Bruce Cameron, Suzanne Chung, Pete De Maio, Steve Driscoll, Lynne Fell, Jamie Frank, Mark McLennan, Lesley Ann Molyneaux, Welton Ryan, Angela Schotsman, Jacob Simonini, Lynda Turcotte, Flo Veel, Amy Wassenaar, Cathy Zahn

**EMS Investigators/Collaborators:** Dana Bradshaw, Rob Burgess, Bruce Cameron, Sandra Chad, Sheldon Cheskes, Allan Craig, Steve Dewar, Tim Dodd, Rob Duquette, Marty Epp, Michael Feldman,

Verena Jones, Russell MacDonald, Larry MacKay, Steve McNenley, Judy Moore, Philip Moran, Michael Murray, Michael Nemeth, Russ Olnyk, Tyrone Perreira, Richard Renaud, Karen Roche, Jennifer Shield, Doug Silver, Jacob Stevens, Rick Verbeek, Tim Waite, Ken Webb, Michelle Welsford

**Hospital Investigators/Collaborators:** Rosemarie Farrell, Jamie Hutchison

**Participating EMS Agencies:**

Ajax Fire and Emergency Services, Barrie Fire and Emergency Service, Beausoleil First Nation Emergency Medical Services, Bradford West Gwillimbury Fire and Emergency Services, Brampton Fire and Emergency Services, Brock Township Fire Dept., Caledon Fire and Emergency Services, City of Hamilton Emergency Services – EMS, City of Hamilton Emergency Services – Fire, City of Orillia Fire Dept., Clarington Emergency and Fire Services, County of Simcoe Paramedic Services, Durham Regional Emergency Medical Services, Innisfil Fire and Rescue Service, Mississauga Fire and Emergency Services, Mnjikaning Fire Rescue Service, Muskoka Ambulance Service, Muskoka Ambulance Communication Center, New Tecumseth Fire Dept., OrngeTransport Medicine, Oro Medonte Fire and Emergency Services, Oshawa Fire Services, Pickering Fire Services, The Ramara Township Fire and Rescue Service, Peel Regional Paramedic Services, Toronto EMS, Toronto Fire Services, Township of Essa Fire Dept., Township of Georgian Bay Fire Dept., Township of Scugog Fire Dept., Township of Uxbridge Fire Dept., Wasaga Beach Fire Dept., Whitby Fire and Emergency Services, Durham Regional Basehospital, Sunnybrook Osler Center for Prehospital Care, Hamilton Health Sciences Paramedic Base Hospital Program, Simcoe Muskoka Basehospital

**Steering Committee Chair,** Myron Weisfeldt, MD, *Johns Hopkins University School of Medicine, Baltimore, MD*, **Co-Chair-Cardiac,** Joseph P. Ornato, MD, *Virginia Commonwealth University Health System, Richmond, VA*, **Co-Chair-Trauma,** David B. Hoyt, MD, *University of California at San Diego, San Diego, CA*, replacing Col. John B. Holcomb, MD, *Commander, U.S. Army ISR*

**National Heart, Lung, and Blood Institute, Bethesda, MD:** Tracey Hoke, MD, George Sopko, MD, MPH, David Lathrop, PhD, Alice Mascette, MD, Patrice Desvigne Nickens, MD

**Clinical Trial Center, University of Washington, Seattle, WA:** Al Hallstrom, PhD, Graham Nichol, MD, MPH, Scott Emerson, MD, PhD, Judy Powell, BSN, Gena Sears, BSN, Berit Bardarson, RN, Lois Van Ottingham, BSN, Anna Leonen, MS, Robert B. Ledingham, MS, Chris Finley, Richard Moore, BS, Ben Bergsten-Buret
